# Supplementary material
Source: PubMed Central journal article supplement (PMC5753039)

Figure 1B

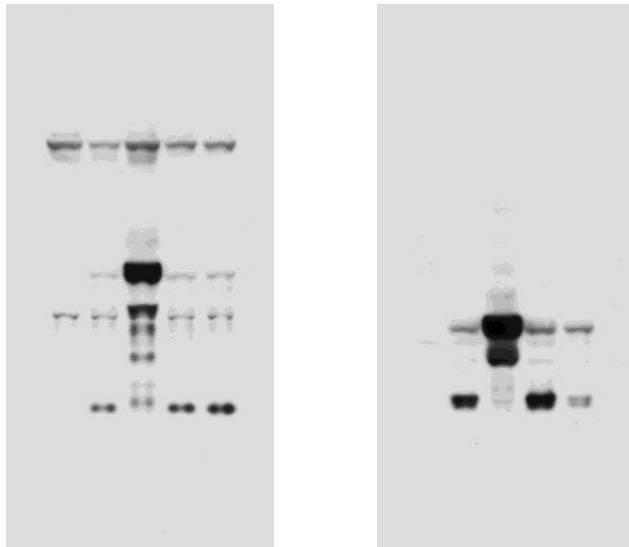

Supplement: EMBJ-37-89-s006.pdf [file EMBJ-37-89-s006.pdf]

Figure 2A

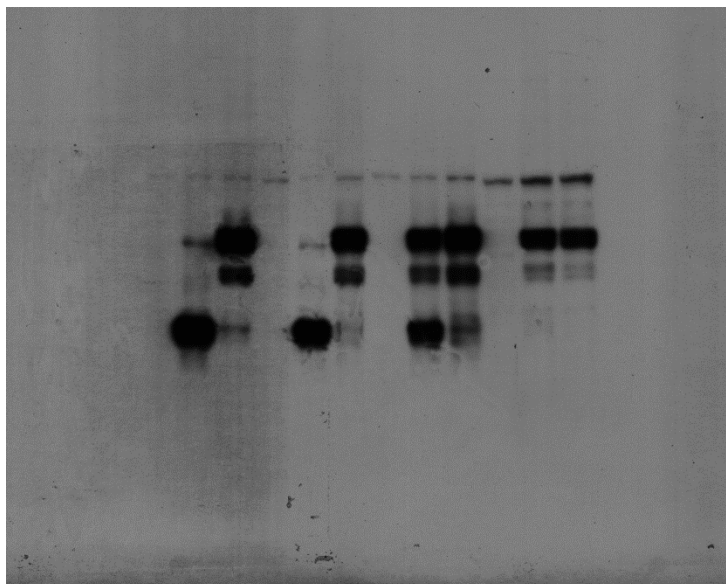

Figure 2B

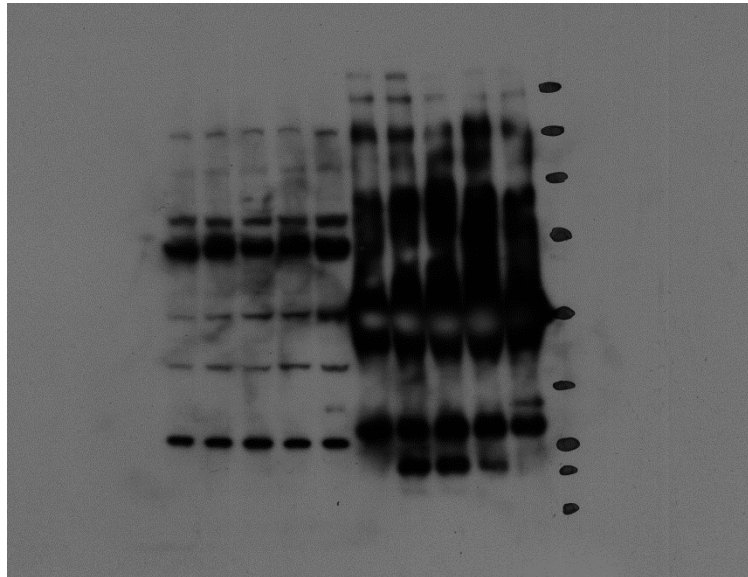

Figure 2C

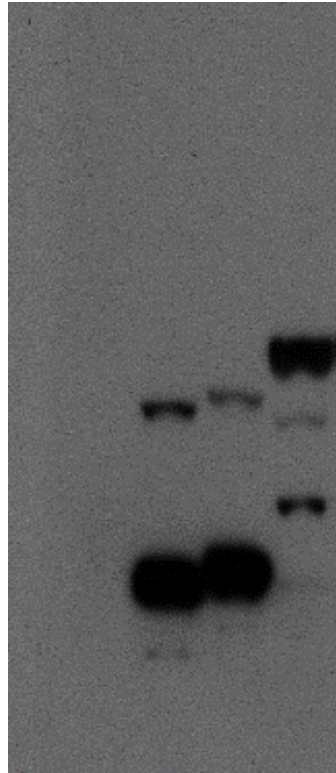

Figure 2D

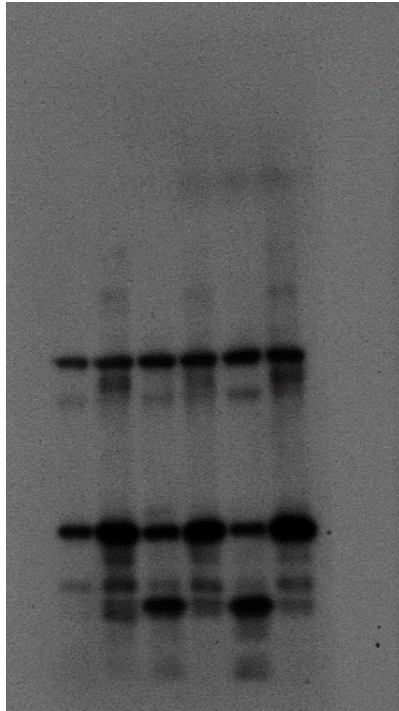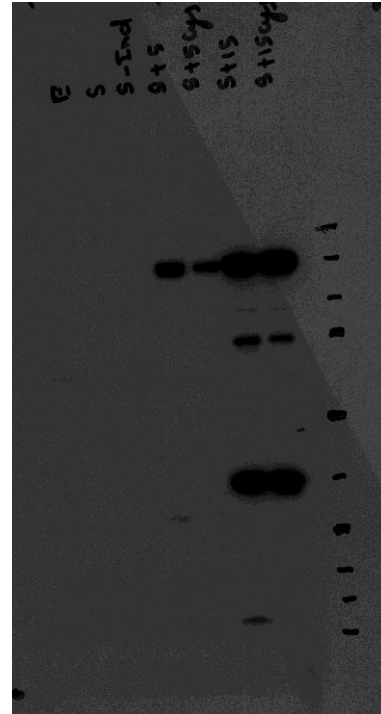

Supplement: EMBJ-37-89-s007.pdf [file EMBJ-37-89-s007.pdf]
